# Supplementary material for: Differential Expression of IgM and IgD Discriminates Two Subpopulations of Human Circulating IgM+IgD+CD27+ B Cells That Differ Phenotypically, Functionally, and Genetically
Source: PubMed Central journal article supplement (PMC7219516; doi:10.3389/fimmu.2020.00736), 2020-05-06
Supplement: Presentation_1.pdf [file Presentation_1.pdf]

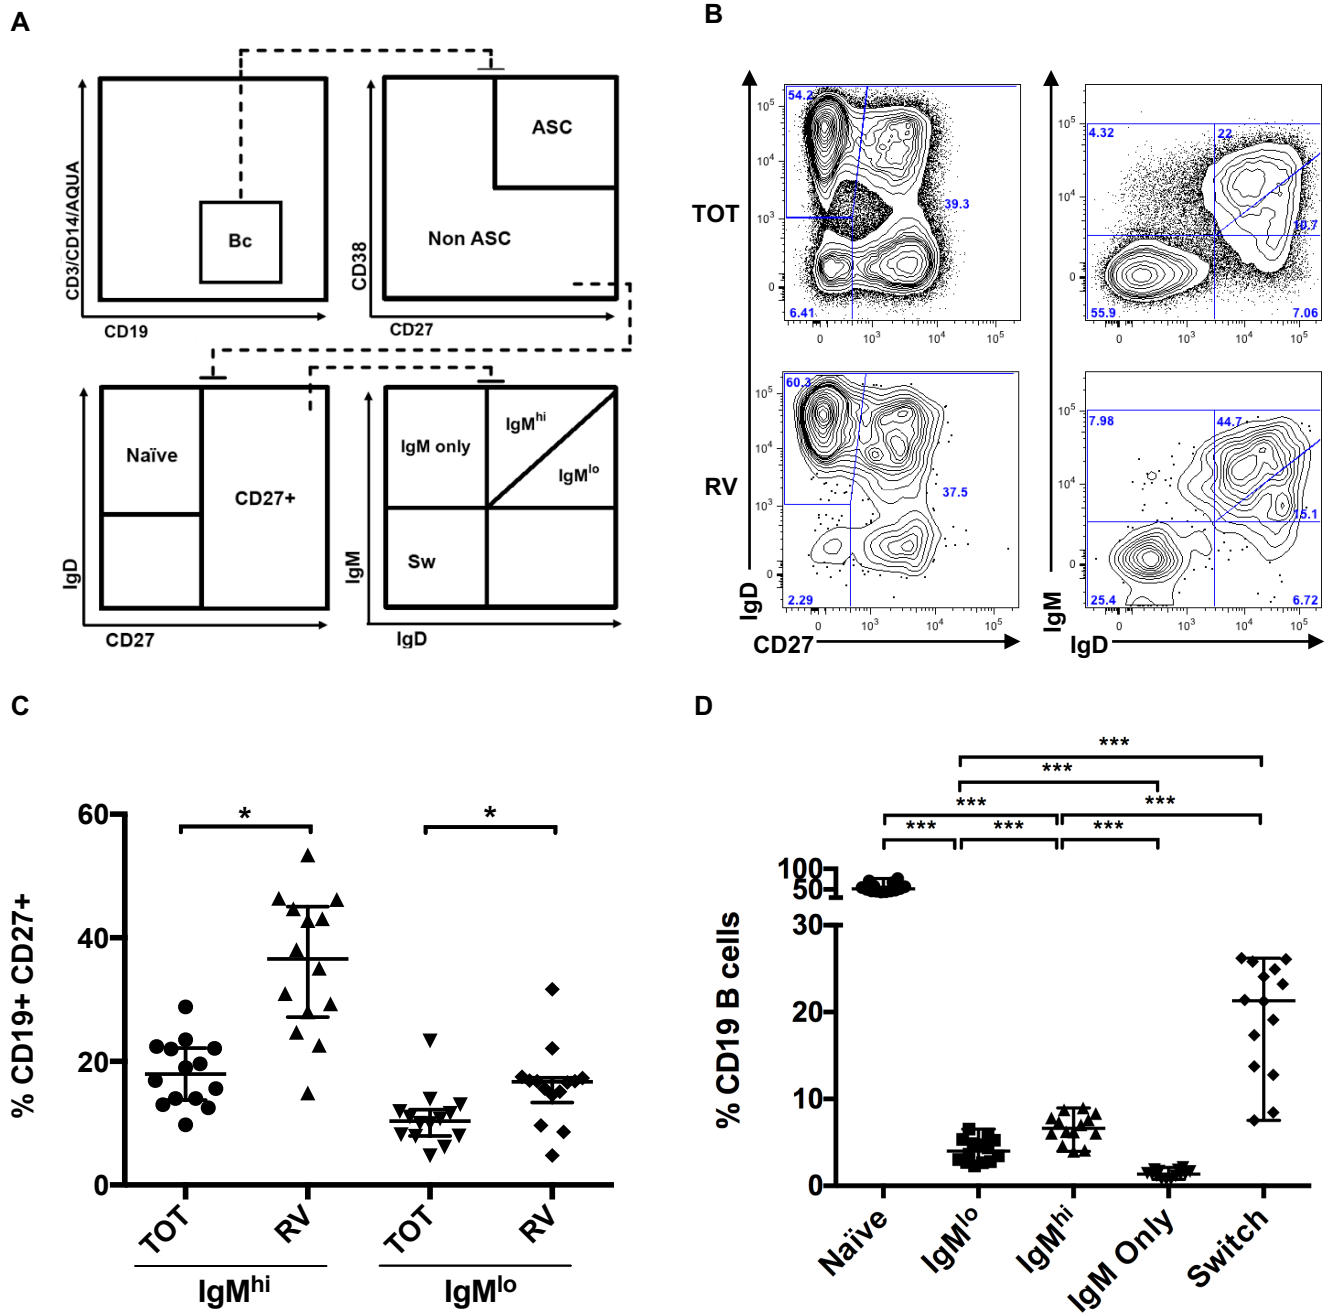

**Supplementary Figure 1.** RV-specific B cells were enriched in the IgM<sup>hi</sup> subset. PBMCs from healthy donors were isolated and stained with GFP-VLPs, anti-CD19, anti-CD38, anti-CD27, anti-IgD, and anti-IgM. (A) Flow cytometry gating strategy. After an initial gate on live (dump channel-cells) CD19<sup>+</sup> B cells, ASC (CD38<sup>hi</sup>, CD27<sup>hi</sup>) are excluded (top two graphs). Then, CD19<sup>+</sup>CD27<sup>+</sup>, total and RV-specific cells (GFP-VLP<sup>+</sup>) were gated, analyzed for the expression of IgD and IgM to define class-switched (Sw) Bmem cells, IgM only Bmem cells, and IgM<sup>hi</sup> and IgM<sup>lo</sup> B cells. (B) A representative example of dot plots for total and RV-B cells is presented. (C) Shown are the percentages of CD19<sup>+</sup> CD27<sup>+</sup> total and RV specific IgM<sup>hi</sup> and IgM<sup>lo</sup> B cells. (D). Percentages of Naive, IgM<sup>lo</sup>, IgM<sup>hi</sup>, IgM Only and class-switched B cells are shown. Wilcoxon tests were used for evaluating differences among groups. Lines and error bars denote the median and interquartile range \* denotes p<0.05. n=14.

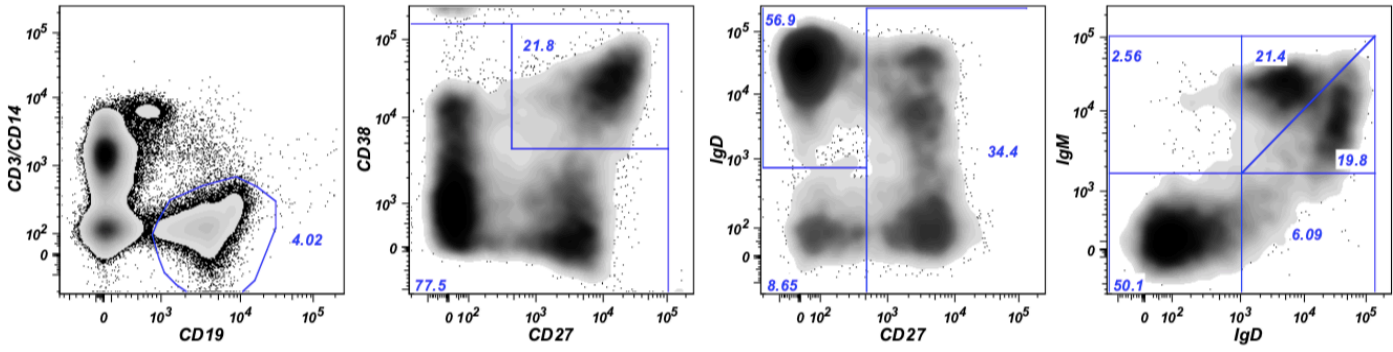

**Supplementary Figure 2.** IgM<sup>hi</sup> and IgM<sup>lo</sup> B cells were identified in a patient with 22q11.2 distal deletion syndrome associated with a p. Ala7dup variant in the *MAPK1* gene. PBMCs from the patient were isolated and stained with anti-CD19, anti-CD38, anti-CD27, anti-IgD, and anti-IgM and analyzed as in Supplementary Fig. 1.

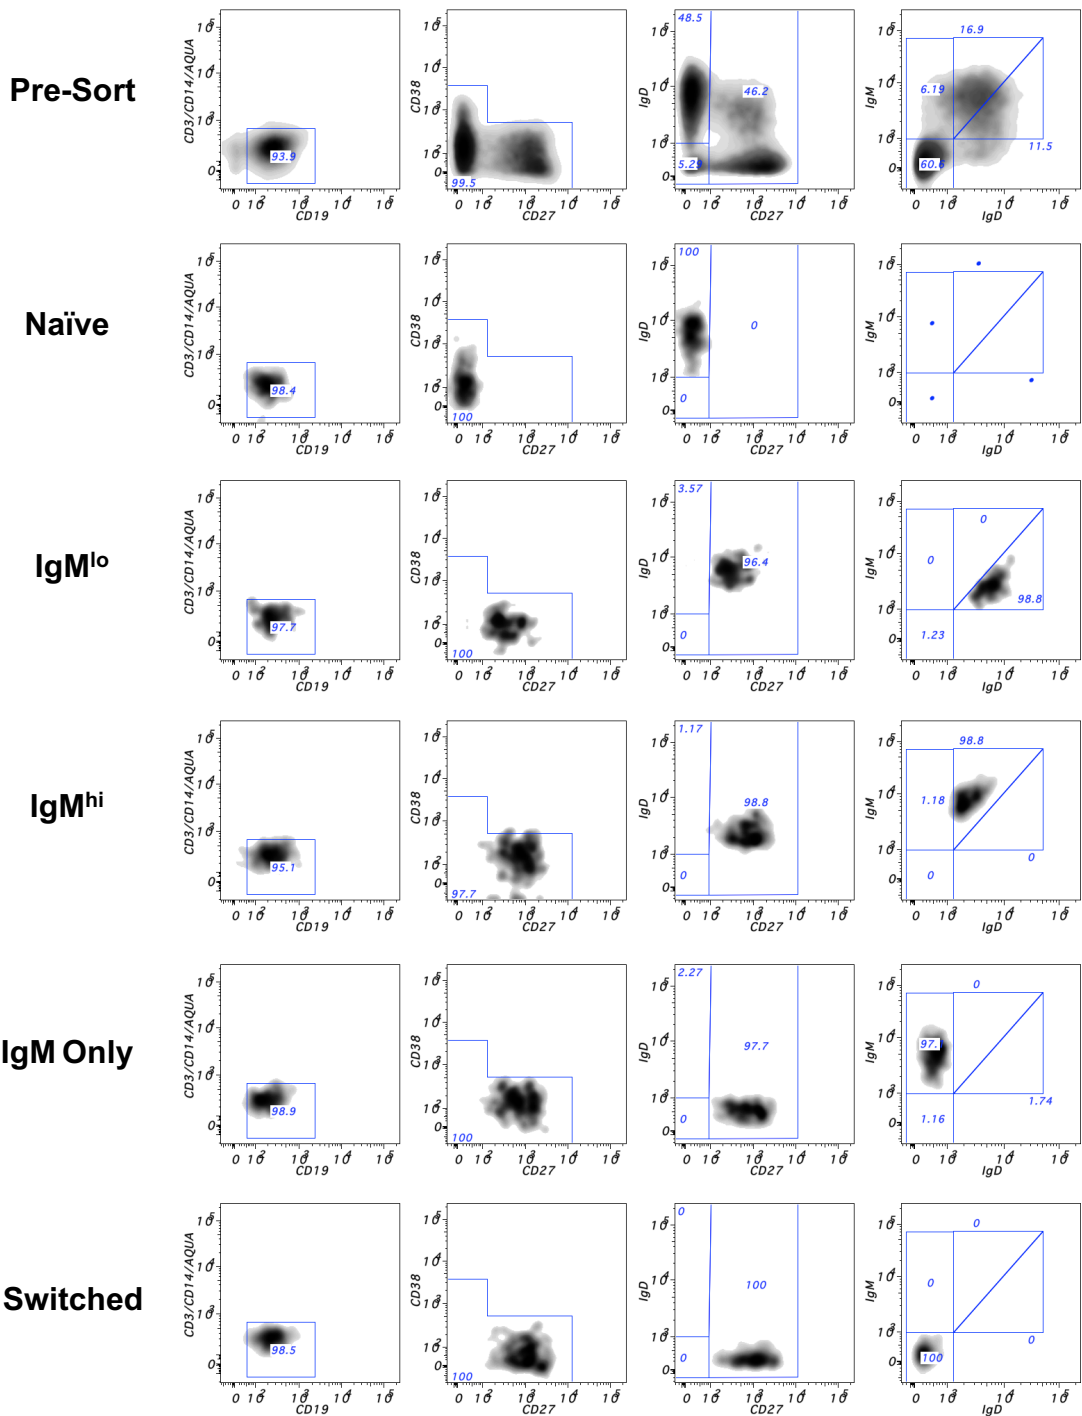

**Supplementary Figure 3.** Purity of B cells subsets obtained after the sorting process. Representative image of the purities obtained after the sorting process from one volunteer. The percentage of cells obtained from top to bottom of the pre-sort is shown, naïve, IgM<sup>lo</sup>, IgM<sup>hi</sup> B cells, IgM Only and switched Bmem cells.

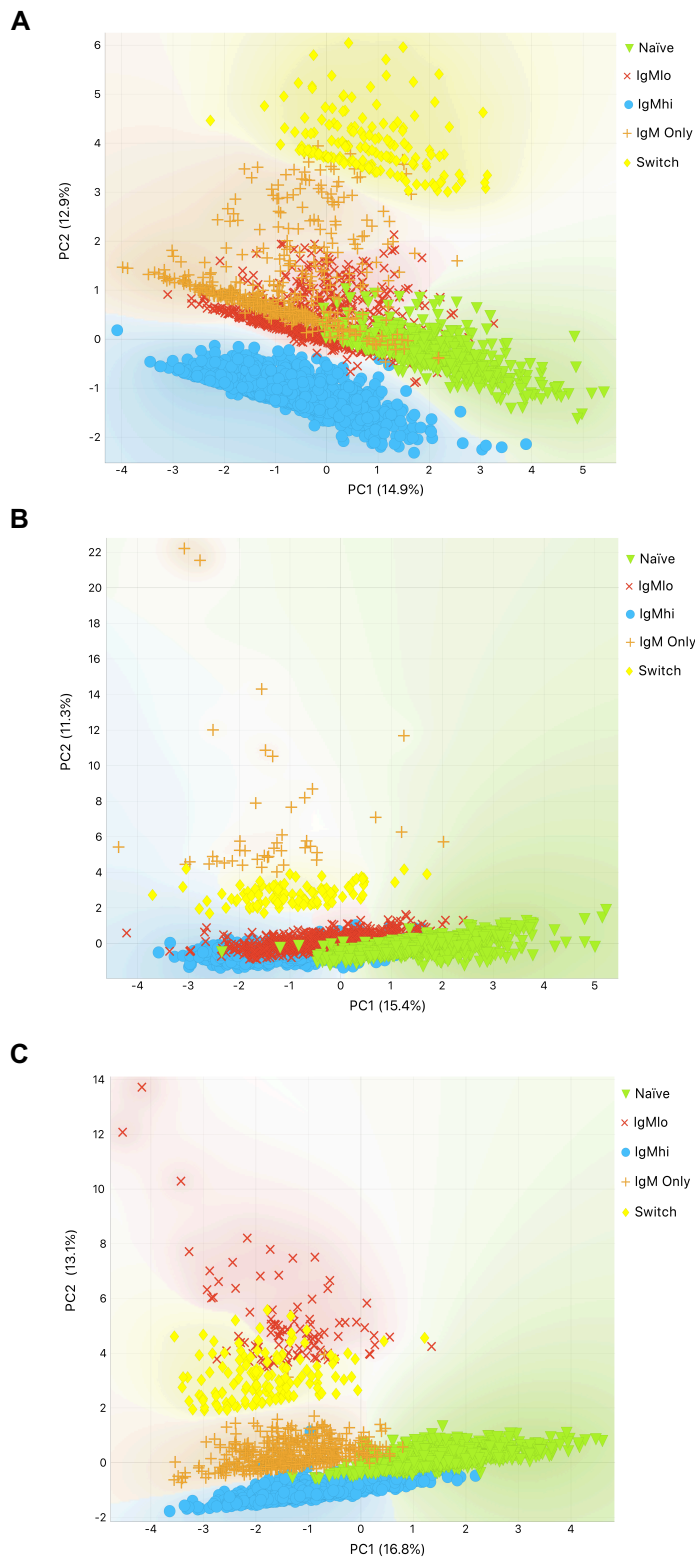

**Supplementary Figure 4.** PCA of HCDR-3 properties. The HCDR-3 length, the relative frequency (number of reads per lineage/total reads in lineages  $\geq 5$  reads), N1 and N2 length, P (P3'V, P5'D, P3'D, and P5'J) length, and % identity of IGHV-IGHJ with the corresponding germline gene were used as input to PCA. Donor 1 (A), donor 2 (B), donor 3 (C).

**Supplementary Table 1. iMFI of markers evaluated on five B cell subsets.** iMFI of markers evaluated on five B cell subsets. Twenty-six markers were evaluated on five B cell subsets. Median and standard deviation of iMFI from these molecules are shown. n=5-18\*.

| Supplementary Table 1. iMFI of markers evaluated on five B cell subsets |                |                   |                   |                |                |      |                                         |                                |                                      |                                      |                             |
|-------------------------------------------------------------------------|----------------|-------------------|-------------------|----------------|----------------|------|-----------------------------------------|--------------------------------|--------------------------------------|--------------------------------------|-----------------------------|
| Marker                                                                  | Subsets        |                   |                   |                |                | K-W  | Wilcoxon Signed Rank Test               |                                |                                      |                                      |                             |
|                                                                         | Naïve          | IgM <sub>lo</sub> | IgM <sub>hi</sub> | IgM Only       | Class-switched |      | IgM <sub>hi</sub> vs. IgM <sub>lo</sub> | IgM <sub>hi</sub> vs. IgM Only | IgM <sub>hi</sub> vs. class-switched | IgM <sub>lo</sub> vs. class-switched | IgM Only vs. class-switched |
| <b>BAFFR n=16</b>                                                       | 1300913±347594 | 1523103±562629    | 1047876±352963    | 906105±253938  | 1038235±334462 | ***  | ***                                     | **                             | ns                                   | ***                                  | *                           |
| <b>CD1c n=5</b>                                                         | 98261±27952    | 318128±53030      | 460194±85821      | 324003±81872   | 107447±23555   | ***  | *                                       | *                              | *                                    | *                                    | *                           |
| <b>CD184 n=7</b>                                                        | 52980±16924    | 25737±9931        | 15752±9932        | 12222±8282     | 14114±9345     | **   | *                                       | *                              | ns                                   | **                                   | *                           |
| <b>CD69 n=5</b>                                                         | 19228±4151     | 29572±6536        | 41972±6930        | 30204±5733     | 10485±2533     | ***  | *                                       | *                              | *                                    | *                                    | *                           |
| <b>CD38 n=15</b>                                                        | 136343±55849   | 85405±54027       | 37737±18734       | 70833±27772    | 66633±20303    | ***  | ***                                     | ***                            | ***                                  | ns                                   | ns                          |
| <b>CD23 n=5</b>                                                         | 50968±22038    | 18104±10158       | 3959±3423         | 1392±526       | 5276±1631      | ***  | *                                       | *                              | ns                                   | *                                    | *                           |
| <b>IL21R n=10</b>                                                       | 8446±6733      | 13959±8739        | 6330±3162         | 6621±5921      | 1612±712       | ***  | **                                      | ns                             | ***                                  | ***                                  | **                          |
| <b>IgM n=7</b>                                                          | 137500±52737   | 344171±62312      | 937686±185567     | 559657±160523  | 0±0            | ***  | *                                       | *                              | *                                    | *                                    | *                           |
| <b>IgD n=7</b>                                                          | 965086±311114  | 679914±164580     | 265329±46358      | 0.2±0          | 0.1±0          | ***  | *                                       | *                              | *                                    | *                                    | *                           |
| <b>CD27 n=8</b>                                                         | 0.04±0.02      | 167825±53229      | 199975±50543      | 231300±57463   | 224463±59160   | **   | *                                       | ns                             | *                                    | *                                    | ns                          |
| <b>CD5 n=6</b>                                                          | 25009±13065    | 12524±4644        | 7423±2524         | 3304±1231      | 5288±3546      | ***  | *                                       | *                              | ns                                   | ns                                   | ns                          |
| <b>CD95 n=7</b>                                                         | 6717±2501      | 93924±30259       | 103618±41575      | 203023±48111   | 340503±132014  | ***  | ns                                      | **                             | **                                   | **                                   | **                          |
| <b>CD11b n=5</b>                                                        | 1913±2560      | 10951±9966        | 11534±5554        | 11181±6672     | 14599±9604     | *    | ns                                      | ns                             | ns                                   | *                                    | ns                          |
| <b>CD11c n=5</b>                                                        | 4188±2700      | 25746±15117       | 24253±12614       | 34122±18100    | 28480±14176    | **   | ns                                      | *                              | ns                                   | ns                                   | *                           |
| <b>CD45RO n=5</b>                                                       | 895±542        | 5176±4033         | 1766±1254         | 9244±7977      | 3202±1634      | *    | ns                                      | ns                             | *                                    | ns                                   | ns                          |
| <b>CD45RB n=7</b>                                                       | 19663±12246    | 1261308±458944    | 1686824±559132    | 1525690±507795 | 652607±196024  | **** | *                                       | *                              | *                                    | *                                    | *                           |
| <b>MTG n=7</b>                                                          | 26614±27647    | 313552±235052     | 435508±313658     | 494699±365408  | 522988±412747  | **   | *                                       | ns                             | ns                                   | *                                    | *                           |
| <b>CD40 n=18</b>                                                        | 912482±464207  | 1060990±620135    | 858488±481876     | 755376±392154  | 858003±448385  | ns   | ***                                     | ***                            | ns                                   | **                                   | **                          |
| <b>CD24 n=7</b>                                                         | 151715±135412  | 550646±464592     | 786362±654270     | 682848±533819  | 273912±255011  | ns   | *                                       | *                              | **                                   | **                                   | **                          |
| <b>CD73 n=7</b>                                                         | 169714±119082  | 104408±83702      | 47682±39732       | 117710±164389  | 203237±182882  | ns   | *                                       | ns                             | *                                    | ns                                   | ns                          |
| <b>CD122 n=6</b>                                                        | 2854±3733      | 8577±7975         | 7487±8944         | 4842±6508      | 2848±3159      | ns   | ns                                      | *                              | *                                    | *                                    | ns                          |
| <b>PD-1 n=5</b>                                                         | 1059±631       | 6147±5424         | 4766±5356         | 2573±2095      | 1559±870       | ns   | ns                                      | *                              | *                                    | *                                    | ns                          |
| <b>TLR9 I n=5</b>                                                       | 71682±22975    | 101789±34778      | 104046±34519      | 105925±34978   | 98921±34866    | ns   | ns                                      | ns                             | *                                    | ns                                   | *                           |
| <b>TLR9 n=6</b>                                                         | 1247±1619      | 5900±6760         | 3659±3842         | 2120±2203      | 1350±1396      | ns   | ns                                      | *                              | *                                    | *                                    | *                           |
| <b>CD21 n=6</b>                                                         | 403062±498991  | 564116±774610     | 363595±443890     | 314576±374458  | 322380±373928  | ns   | *                                       | *                              | ns                                   | *                                    | ns                          |
| <b>CD43 n=5</b>                                                         | 3383±4710      | 24654±24871       | 10264±14500       | 89099±185536   | 77186±138146   | ns   | ns                                      | *                              | *                                    | ns                                   | ns                          |

\*Kruskal-Wallis and Wilcoxon signed-rank tests were used for evaluating differences among Bc subsets: p≥0.05 (ns: not significant), p≤0.05 (\*), P≤ 0.01 (\*\*), p≤0.001 (\*\*\*), p≤0.0001 (\*\*\*\*)

**Supplementary Table 2. List of differentially expressed genes between IgM<sub>hi</sub> and IgM<sub>lo</sub> B cells.** Entrez Gene ID, symbol, and a short description of 78 differentially expressed genes between IgM<sub>hi</sub> and IgM<sub>lo</sub> B cells are shown\*.

| Supplementary Table 2. List of differentially expressed genes between IgM <sub>hi</sub> and IgM <sub>lo</sub> B cells |           |                                                                         |                               |      |       |        |      |      |          |      |                   |      |       |                   |      |      |
|-----------------------------------------------------------------------------------------------------------------------|-----------|-------------------------------------------------------------------------|-------------------------------|------|-------|--------|------|------|----------|------|-------------------|------|-------|-------------------|------|------|
| Entrez Gene ID                                                                                                        | Symbol    | Description                                                             | log <sub>2</sub> (expression) |      |       |        |      |      |          |      |                   |      |       |                   |      |      |
|                                                                                                                       |           |                                                                         | Naïve                         |      |       | Switch |      |      | IgM only |      | IgM <sub>lo</sub> |      |       | IgM <sub>hi</sub> |      |      |
|                                                                                                                       |           |                                                                         | 1                             | 2    | 3     | 1      | 2    | 3    | 1        | 3    | 1                 | 2    | 3     | 1                 | 2    | 3    |
| <a href="#">9215</a>                                                                                                  | LARGE1    | LARGE xylosyl- and glucuronyltransferase 1                              | 6,31                          | 6,46 | 6,39  | 5,39   | 5,34 | 5,34 | 4,78     | 4,73 | 5,18              | 5,49 | 5,48  | 4,54              | 4,73 | 4,90 |
| <a href="#">113791</a>                                                                                                | PIK3IP1   | phosphoinositide-3-kinase interacting protein 1                         | 7,31                          | 7,07 | 8,25  | 6,88   | 6,16 | 7,51 | 6,26     | 6,02 | 6,67              | 6,32 | 7,50  | 6,27              | 5,97 | 7,07 |
| <a href="#">23635</a>                                                                                                 | SSBP2     | single stranded DNA binding protein 2                                   | 7,35                          | 7,38 | 7,01  | 6,32   | 6,45 | 6,24 | 5,36     | 5,11 | 5,78              | 6,08 | 6,32  | 5,13              | 5,52 | 5,71 |
| <a href="#">5287</a>                                                                                                  | PIK3C2B   | phosphatidylinositol-4-phosphate 3-kinase catalytic subunit type 2 beta | 6,94                          | 7,03 | 6,96  | 6,04   | 6,26 | 5,98 | 5,47     | 5,44 | 5,98              | 5,93 | 6,04  | 5,41              | 5,48 | 5,59 |
| <a href="#">23370</a>                                                                                                 | ARHGEF18  | Rho/Rac guanine nucleotide exchange factor 18                           | 7,20                          | 7,48 | 7,37  | 6,95   | 7,15 | 7,03 | 6,71     | 6,81 | 6,88              | 7,00 | 6,97  | 6,64              | 6,83 | 6,75 |
| <a href="#">253558</a>                                                                                                | LCLAT1    | lysocardiolipin acyltransferase 1                                       | 5,36                          | 5,02 | 4,90  | 4,86   | 4,78 | 4,48 | 4,70     | 4,50 | 4,99              | 4,65 | 4,63  | 4,87              | 4,52 | 4,52 |
| <a href="#">5243</a>                                                                                                  | ABCB1     | ATP binding cassette subfamily B member 1                               | 3,78                          | 4,11 | 3,73  | 2,19   | 2,39 | 2,37 | 2,08     | 2,12 | 2,43              | 2,43 | 2,64  | 2,10              | 2,12 | 2,27 |
| <a href="#">9743</a>                                                                                                  | ARHGAP32  | Rho GTPase activating protein 32                                        | 4,71                          | 4,31 | 5,03  | 2,49   | 2,47 | 2,59 | 2,41     | 2,26 | 2,59              | 2,62 | 2,66  | 2,37              | 2,44 | 2,43 |
| <a href="#">101927777</a>                                                                                             | SATB1-AS1 | SATB1 antisense RNA 1                                                   | 4,72                          | 4,82 | 4,74  | 3,29   | 3,38 | 3,38 | 3,34     | 3,33 | 3,32              | 3,61 | 3,51  | 2,89              | 3,21 | 3,20 |
| <a href="#">57205</a>                                                                                                 | ATP10D    | ATPase phospholipid transporting 10D (putative)                         | 6,30                          | 6,38 | 5,85  | 4,66   | 4,79 | 4,91 | 4,39     | 4,34 | 5,08              | 4,93 | 5,15  | 4,63              | 4,51 | 4,77 |
| <a href="#">8527</a>                                                                                                  | DGKD      | diacylglycerol kinase delta                                             | 7,25                          | 7,44 | 7,18  | 6,46   | 6,51 | 6,23 | 6,02     | 6,19 | 6,41              | 6,51 | 6,35  | 6,15              | 6,28 | 6,03 |
| <a href="#">6452</a>                                                                                                  | SH3BP2    | SH3 domain binding protein 2                                            | 6,37                          | 6,49 | 6,76  | 5,68   | 5,59 | 5,61 | 5,40     | 5,50 | 5,68              | 5,68 | 6,00  | 5,40              | 5,33 | 5,64 |
| <a href="#">952</a>                                                                                                   | CD38      | CD38 molecule                                                           | 5,14                          | 5,94 | 5,30  | 3,85   | 4,12 | 4,02 | 3,81     | 3,91 | 3,49              | 3,91 | 3,91  | 3,21              | 3,60 | 3,62 |
| <a href="#">3689</a>                                                                                                  | ITGB2     | integrin subunit beta 2                                                 | 6,84                          | 6,75 | 6,98  | 6,95   | 6,62 | 6,66 | 6,26     | 6,18 | 6,83              | 6,74 | 6,65  | 6,53              | 6,45 | 6,35 |
| <a href="#">11345</a>                                                                                                 | GABARAPL2 | GABA type A receptor associated protein like 2                          | 7,10                          | 7,12 | 7,18  | 7,15   | 6,98 | 7,09 | 6,56     | 6,41 | 6,93              | 6,89 | 7,08  | 6,74              | 6,64 | 6,84 |
| <a href="#">2550</a>                                                                                                  | GABBR1    | gamma-aminobutyric acid type B receptor subunit 1                       | 7,09                          | 7,39 | 6,83  | 6,96   | 6,94 | 6,72 | 6,59     | 6,67 | 6,86              | 6,91 | 6,60  | 6,62              | 6,70 | 6,40 |
| <a href="#">25844</a>                                                                                                 | YIPF3     | Yip1 domain family member 3                                             | 5,82                          | 5,63 | 5,84  | 5,77   | 5,58 | 5,71 | 5,58     | 5,34 | 5,71              | 5,37 | 5,53  | 5,58              | 5,24 | 5,38 |
| <a href="#">3139</a>                                                                                                  | HLA-L     | major histocompatibility complex, class I, L (pseudogene)               | 5,87                          | 6,15 | 5,97  | 5,62   | 5,88 | 5,93 | 5,43     | 5,84 | 5,88              | 6,12 | 6,13  | 5,64              | 5,88 | 5,88 |
| <a href="#">28475</a>                                                                                                 | IGHJ6     | immunoglobulin heavy joining 6                                          | 8,75                          | 8,37 | 10,97 | 8,32   | 7,91 | 9,95 | 7,47     | 7,24 | 8,55              | 8,30 | 10,73 | 7,76              | 7,51 | 9,68 |
| <a href="#">28468</a>                                                                                                 | IGHV1-18  | immunoglobulin heavy variable 1-18                                      | 7,53                          | 8,37 | 7,97  | 5,38   | 5,25 | 3,83 | 4,69     | 3,15 | 7,29              | 7,26 | 6,54  | 5,11              | 5,61 | 4,66 |
| <a href="#">50615</a>                                                                                                 | IL21R     | interleukin 21 receptor                                                 | 4,64                          | 4,75 | 4,85  | 3,66   | 3,64 | 3,71 | 3,91     | 4,01 | 4,05              | 4,22 | 4,43  | 3,71              | 3,93 | 4,04 |
| <a href="#">1848</a>                                                                                                  | DUSP6     | dual specificity phosphatase 6                                          | 5,81                          | 5,92 | 5,71  | 3,93   | 3,61 | 3,90 | 4,24     | 3,93 | 4,57              | 4,24 | 4,52  | 4,22              | 3,91 | 4,24 |

|                           |              |                                                          |      |      |      |      |      |      |      |      |      |      |      |      |      |      |
|---------------------------|--------------|----------------------------------------------------------|------|------|------|------|------|------|------|------|------|------|------|------|------|------|
| <a href="#">59338</a>     | PLEKHA1      | pleckstrin homology domain containing A1                 | 6,27 | 6,04 | 6,04 | 4,60 | 4,34 | 4,72 | 5,04 | 4,65 | 5,21 | 4,85 | 5,22 | 5,07 | 4,70 | 5,07 |
| <a href="#">100131691</a> | MZF1-AS1     | MZF1 antisense RNA 1                                     | 4,25 | 4,32 | 4,29 | 3,82 | 3,95 | 3,93 | 4,06 | 4,08 | 4,16 | 4,18 | 4,17 | 4,01 | 4,05 | 4,00 |
| <a href="#">56941</a>     | HMCES        | 5-hydroxymethylcytosine (hmC) binding, ES cell-specific  | 5,38 | 5,64 | 5,84 | 4,90 | 4,90 | 4,84 | 4,89 | 5,03 | 5,17 | 5,21 | 5,27 | 5,01 | 5,01 | 5,13 |
| <a href="#">605</a>       | BCL7A        | BCL tumor suppressor 7A                                  | 7,75 | 7,26 | 7,77 | 6,30 | 5,59 | 6,30 | 6,16 | 5,51 | 6,77 | 6,23 | 6,78 | 6,48 | 5,91 | 6,50 |
| <a href="#">11213</a>     | IRAK3        | interleukin 1 receptor associated kinase 3               | 4,21 | 3,23 | 4,81 | 2,44 | 2,39 | 2,58 | 2,63 | 2,39 | 3,18 | 2,67 | 3,43 | 2,83 | 2,32 | 3,08 |
| <a href="#">8115</a>      | TCL1A        | T-cell leukemia/lymphoma 1A                              | 8,28 | 8,50 | 8,30 | 4,03 | 4,13 | 4,07 | 3,97 | 4,25 | 5,18 | 5,33 | 5,75 | 4,09 | 4,29 | 4,40 |
| <a href="#">6565</a>      | SLC15A2      | solute carrier family 15 member 2                        | 5,24 | 4,50 | 4,05 | 4,35 | 3,86 | 3,60 | 4,16 | 3,73 | 4,67 | 4,16 | 4,00 | 4,42 | 3,81 | 3,72 |
| <a href="#">54849</a>     | DEF8         | differentially expressed in FDCP 8 homolog               | 5,70 | 5,92 | 5,95 | 5,23 | 5,31 | 5,31 | 4,83 | 5,17 | 5,27 | 5,57 | 5,53 | 4,98 | 5,19 | 5,18 |
| <a href="#">64781</a>     | CERK         | ceramide kinase                                          | 5,88 | 5,77 | 5,62 | 5,21 | 5,02 | 4,99 | 4,93 | 4,94 | 5,45 | 5,42 | 5,33 | 5,10 | 4,97 | 4,89 |
| <a href="#">28474</a>     | IGHV1-2      | immunoglobulin heavy variable 1-2                        | 8,91 | 8,39 | 7,99 | 6,90 | 5,59 | 4,76 | 5,99 | 5,56 | 8,41 | 6,52 | 6,11 | 7,20 | 5,48 | 5,18 |
| <a href="#">151888</a>    | BTLA         | B and T lymphocyte associated                            | 6,91 | 7,30 | 7,06 | 6,02 | 5,48 | 6,11 | 5,54 | 5,08 | 6,37 | 5,85 | 6,40 | 6,07 | 5,61 | 6,12 |
| <a href="#">5826</a>      | ABCD4        | ATP binding cassette subfamily D member 4                | 5,26 | 5,38 | 5,39 | 5,19 | 5,14 | 5,14 | 5,13 | 5,20 | 5,20 | 5,20 | 5,19 | 5,14 | 5,12 | 5,12 |
| <a href="#">10391</a>     | CORO2B       | coronin 2B                                               | 4,94 | 5,44 | 5,44 | 4,06 | 3,60 | 4,48 | 3,58 | 4,04 | 4,19 | 4,17 | 4,46 | 3,92 | 3,86 | 4,19 |
| <a href="#">100379296</a> | RNY4P13      | RNA, Ro-associated Y4 pseudogene 13                      | 4,36 | 4,03 | 3,44 | 3,71 | 3,24 | 2,85 | 3,25 | 2,67 | 3,45 | 2,57 | 2,63 | 4,03 | 3,23 | 3,44 |
| <a href="#">100286946</a> | LOC100286946 | ribosomal protein S3A pseudogene                         | 4,26 | 4,13 | 4,32 | 4,14 | 4,13 | 4,37 | 3,99 | 3,91 | 4,26 | 4,20 | 4,26 | 4,36 | 4,34 | 4,39 |
| <a href="#">100130548</a> | LOC100130548 | uncharacterized LOC100130548                             | 4,46 | 4,43 | 4,64 | 4,02 | 3,99 | 4,05 | 4,38 | 4,30 | 4,37 | 4,63 | 4,67 | 4,15 | 4,35 | 4,35 |
| <a href="#">56937</a>     | PMEPA1       | prostate transmembrane protein, androgen induced 1       | 4,84 | 4,89 | 5,02 | 4,62 | 4,53 | 4,54 | 4,72 | 4,79 | 4,77 | 4,89 | 4,90 | 4,68 | 4,80 | 4,83 |
| <a href="#">2268</a>      | FGR          | FGR proto-oncogene, Src family tyrosine kinase           | 5,78 | 5,58 | 5,57 | 5,28 | 5,14 | 5,02 | 5,23 | 5,28 | 5,84 | 5,81 | 5,45 | 5,44 | 5,48 | 5,13 |
| <a href="#">374928</a>    | ZNF773       | zinc finger protein 773                                  | 4,16 | 4,24 | 4,46 | 3,86 | 3,92 | 4,20 | 4,21 | 4,12 | 4,42 | 4,45 | 4,56 | 4,21 | 4,21 | 4,39 |
| <a href="#">100271259</a> | RPS3AP33     | ribosomal protein S3a pseudogene 33                      | 3,31 | 3,08 | 3,94 | 2,90 | 3,47 | 3,84 | 4,26 | 4,00 | 3,70 | 3,73 | 4,06 | 2,66 | 2,59 | 2,89 |
| <a href="#">5143</a>      | PDE4C        | phosphodiesterase 4C                                     | 4,67 | 4,74 | 4,75 | 4,58 | 4,63 | 4,67 | 4,67 | 4,80 | 4,67 | 4,78 | 4,79 | 4,57 | 4,67 | 4,67 |
| <a href="#">249</a>       | ALPL         | alkaline phosphatase, liver/bone/kidney                  | 3,99 | 4,05 | 4,06 | 3,91 | 3,98 | 4,00 | 4,23 | 4,46 | 4,24 | 4,33 | 4,22 | 4,54 | 4,67 | 4,56 |
| <a href="#">84957</a>     | RELT         | RELT tumor necrosis factor receptor                      | 5,79 | 6,24 | 5,95 | 5,85 | 6,20 | 6,10 | 5,98 | 6,43 | 6,16 | 6,67 | 6,39 | 6,02 | 6,51 | 6,27 |
| <a href="#">11140</a>     | CDC37        | cell division cycle 37                                   | 7,01 | 7,07 | 6,97 | 7,15 | 7,04 | 7,18 | 7,12 | 7,23 | 7,36 | 7,43 | 7,44 | 7,25 | 7,31 | 7,35 |
| <a href="#">58516</a>     | FAM60A       | family with sequence similarity 60 member A              | 6,22 | 5,74 | 5,82 | 6,97 | 6,54 | 7,05 | 6,46 | 6,19 | 6,47 | 6,00 | 6,43 | 6,72 | 6,22 | 6,64 |
| <a href="#">51699</a>     | VPS29        | VPS29, retromer complex component                        | 4,14 | 3,88 | 3,94 | 4,78 | 4,34 | 4,61 | 4,09 | 4,13 | 4,21 | 4,01 | 4,20 | 4,37 | 4,16 | 4,33 |
| <a href="#">645579</a>    | EIF4BP6      | eukaryotic translation initiation factor 4B pseudogene 6 | 7,74 | 7,37 | 7,80 | 8,31 | 7,93 | 8,49 | 7,99 | 7,47 | 8,12 | 7,51 | 8,00 | 8,36 | 7,84 | 8,30 |
| <a href="#">79893</a>     | GGNBP2       | gametogenetin binding protein 2                          | 7,21 | 6,86 | 6,97 | 7,40 | 7,21 | 7,41 | 7,43 | 7,16 | 7,21 | 6,80 | 6,93 | 7,55 | 7,13 | 7,21 |
| <a href="#">1808</a>      | DPYSL2       | dihydropyrimidinase like 2                               | 4,93 | 4,87 | 4,99 | 6,07 | 5,87 | 5,63 | 5,21 | 5,18 | 5,40 | 5,22 | 5,22 | 5,17 | 4,99 | 5,04 |
| <a href="#">100271548</a> | RPS10P26     | ribosomal protein S10 pseudogene 26                      | 8,47 | 8,02 | 8,50 | 9,06 | 8,70 | 9,22 | 8,79 | 8,04 | 8,64 | 8,08 | 8,60 | 8,89 | 8,26 | 8,78 |
| <a href="#">6894</a>      | TARBP1       | TAR (HIV-1) RNA binding protein 1                        | 4,50 | 4,54 | 3,83 | 4,96 | 5,25 | 4,54 | 4,80 | 4,65 | 4,46 | 4,48 | 4,01 | 4,70 | 4,69 | 4,27 |

Supplementary Material

|                           |         |                                                                |      |      |      |      |      |      |      |      |      |      |      |      |      |      |
|---------------------------|---------|----------------------------------------------------------------|------|------|------|------|------|------|------|------|------|------|------|------|------|------|
| <a href="#">11044</a>     | PAPD7   | poly(A) RNA polymerase D7, non-canonical                       | 5,62 | 5,66 | 5,48 | 5,99 | 6,23 | 6,04 | 6,22 | 6,18 | 5,99 | 5,99 | 5,90 | 6,15 | 6,13 | 6,05 |
| <a href="#">169981</a>    | SPIN3   | spindlin family member 3                                       | 3,49 | 3,31 | 3,42 | 3,67 | 3,83 | 3,67 | 3,71 | 3,76 | 3,62 | 3,65 | 3,65 | 3,66 | 3,70 | 3,69 |
| <a href="#">941</a>       | CD80    | CD80 molecule                                                  | 3,74 | 3,16 | 2,81 | 6,55 | 7,14 | 6,15 | 5,90 | 6,20 | 5,42 | 5,80 | 4,70 | 5,96 | 6,29 | 5,12 |
| <a href="#">3927</a>      | LASP1   | LIM and SH3 protein 1                                          | 6,44 | 6,43 | 6,51 | 7,04 | 6,93 | 6,89 | 6,87 | 6,80 | 6,84 | 6,71 | 6,70 | 6,91 | 6,76 | 6,75 |
| <a href="#">3684</a>      | ITGAM   | integrin subunit alpha M                                       | 4,31 | 4,33 | 4,14 | 6,82 | 7,02 | 6,32 | 6,41 | 6,48 | 6,03 | 5,73 | 5,20 | 6,56 | 6,32 | 5,75 |
| <a href="#">5464</a>      | PPA1    | pyrophosphatase (inorganic) 1                                  | 4,60 | 4,08 | 4,65 | 5,75 | 5,06 | 5,71 | 5,22 | 4,90 | 5,06 | 4,54 | 5,19 | 5,32 | 4,77 | 5,39 |
| <a href="#">81552</a>     | VOPP1   | vesicular, overexpressed in cancer, prosurvival protein 1      | 5,52 | 5,68 | 5,53 | 6,34 | 6,67 | 6,36 | 6,35 | 6,59 | 6,01 | 6,16 | 5,94 | 6,15 | 6,32 | 6,09 |
| <a href="#">51808</a>     | PHAX    | phosphorylated adaptor for RNA export                          | 3,82 | 3,21 | 3,62 | 5,45 | 4,98 | 5,58 | 5,47 | 4,54 | 4,69 | 4,00 | 4,70 | 5,18 | 4,41 | 5,19 |
| <a href="#">5862</a>      | RAB2A   | RAB2A, member RAS oncogene family                              | 6,22 | 5,71 | 6,00 | 6,57 | 6,12 | 6,58 | 6,50 | 5,96 | 6,30 | 5,85 | 6,24 | 6,47 | 5,97 | 6,40 |
| <a href="#">10213</a>     | PSMD14  | proteasome 26S subunit, non-ATPase 14                          | 4,57 | 4,38 | 4,34 | 5,09 | 4,99 | 5,24 | 5,19 | 4,82 | 4,85 | 4,58 | 4,84 | 5,13 | 4,85 | 5,08 |
| <a href="#">5552</a>      | SRGN    | serglycin                                                      | 5,03 | 5,34 | 5,88 | 6,04 | 5,86 | 6,38 | 5,80 | 5,83 | 5,76 | 6,04 | 6,50 | 5,71 | 6,00 | 6,46 |
| <a href="#">54915</a>     | YTHDF1  | YTH N6-methyladenosine RNA binding protein 1                   | 6,21 | 5,59 | 6,03 | 6,46 | 5,90 | 6,41 | 6,54 | 5,80 | 6,43 | 5,98 | 6,39 | 6,56 | 6,13 | 6,51 |
| <a href="#">169200</a>    | TMEM64  | transmembrane protein 64                                       | 4,70 | 4,15 | 4,38 | 5,35 | 4,51 | 4,95 | 5,18 | 4,58 | 5,32 | 4,55 | 4,97 | 5,54 | 4,78 | 5,14 |
| <a href="#">102465502</a> | MIR6835 | microRNA 6835                                                  | 3,89 | 4,20 | 4,01 | 4,72 | 4,88 | 4,96 | 4,49 | 4,92 | 4,24 | 4,73 | 4,84 | 4,83 | 5,33 | 5,32 |
| <a href="#">644330</a>    | TPM3P5  | tropomyosin 3 pseudogene 5                                     | 5,77 | 5,58 | 5,93 | 6,24 | 6,24 | 6,23 | 6,10 | 5,92 | 6,27 | 5,97 | 6,25 | 6,49 | 6,14 | 6,44 |
| <a href="#">266783</a>    | PSMD2P1 | proteasome 26S subunit, non-ATPase, 2 pseudogene 1             | 5,38 | 5,29 | 5,32 | 5,81 | 5,62 | 5,61 | 5,56 | 5,64 | 5,68 | 5,51 | 5,52 | 5,76 | 5,60 | 5,60 |
| <a href="#">135112</a>    | NCOA7   | nuclear receptor coactivator 7                                 | 3,69 | 3,47 | 3,94 | 4,94 | 5,05 | 5,04 | 4,80 | 4,62 | 4,67 | 4,43 | 4,49 | 5,06 | 4,83 | 4,87 |
| <a href="#">81611</a>     | ANP32E  | acidic nuclear phosphoprotein 32 family member E               | 5,32 | 5,15 | 5,24 | 5,70 | 5,59 | 5,91 | 5,65 | 5,48 | 5,69 | 5,42 | 5,59 | 5,86 | 5,59 | 5,76 |
| <a href="#">160365</a>    | CLECL1  | C-type lectin like 1                                           | 2,63 | 2,63 | 2,77 | 3,85 | 3,71 | 3,65 | 4,01 | 3,48 | 3,85 | 3,36 | 3,54 | 4,32 | 3,73 | 3,91 |
| <a href="#">6566</a>      | SLC16A1 | solute carrier family 16 member 1                              | 4,28 | 4,33 | 4,34 | 5,05 | 5,24 | 5,12 | 5,05 | 5,15 | 4,96 | 4,90 | 5,09 | 5,23 | 5,19 | 5,36 |
| <a href="#">55299</a>     | BRX1    | BRX1, biogenesis of ribosomes                                  | 5,89 | 5,34 | 5,56 | 6,37 | 5,93 | 6,43 | 6,33 | 5,97 | 6,26 | 5,65 | 6,11 | 6,59 | 5,99 | 6,46 |
| <a href="#">84248</a>     | FYTTD1  | forty-two-three domain containing 1                            | 6,08 | 5,44 | 5,94 | 6,27 | 6,05 | 6,84 | 6,83 | 6,44 | 6,60 | 6,03 | 6,82 | 7,10 | 6,51 | 7,25 |
| <a href="#">54165</a>     | DCUN1D1 | defective in cullin neddylation 1 domain containing 1          | 5,05 | 4,67 | 5,07 | 5,25 | 5,23 | 5,43 | 5,71 | 5,28 | 5,20 | 4,99 | 5,28 | 5,60 | 5,30 | 5,70 |
| <a href="#">55176</a>     | SEC61A2 | Sec61 translocon alpha 2 subunit                               | 4,97 | 5,13 | 4,51 | 5,26 | 5,59 | 4,96 | 5,49 | 5,49 | 5,24 | 5,37 | 4,83 | 5,43 | 5,62 | 5,06 |
| <a href="#">646981</a>    | PTPN2P1 | protein tyrosine phosphatase, non-receptor type 2 pseudogene 1 | 4,49 | 4,92 | 4,46 | 5,08 | 5,35 | 5,17 | 5,43 | 5,43 | 5,12 | 5,29 | 4,84 | 5,54 | 5,61 | 5,28 |

\*LME ANOVA expression-filtered FDR  $q < 0.001$  and  $IgM_{hi}$  vs.  $IgM_{lo}$   $p < 0.01$



**Supplementary Table 3. Percentages of shared IGH clonotypes per donor.** Numbers and percentages of IGH defined clonotypes shared between B cell subsets per donor. Clonally related sequences were identified based on 100% HCDR3 nucleotide identity, and same usage of *IGHV* and *IGHJ* gene usage. Total, unique, and shared clonotypes for each subset of B cells per donor are shown. Percentage is shown in parenthesis.

| <b>Supplementary Table 3. Frequencies and percentages of shared IGH clonotypes per donor</b> |                                    |                                        |                         |                         |                 |
|----------------------------------------------------------------------------------------------|------------------------------------|----------------------------------------|-------------------------|-------------------------|-----------------|
| <b>Donor 1</b>                                                                               |                                    |                                        |                         |                         |                 |
| <b>Group</b>                                                                                 | <b>Number of Shared clonotypes</b> | <b>Percentage of shared clonotypes</b> |                         |                         |                 |
|                                                                                              |                                    | <b>Naïve</b>                           | <b>IgM<sub>lo</sub></b> | <b>IgM<sub>hi</sub></b> | <b>IgM Only</b> |
| IgM <sub>lo</sub> IgM only IgM <sub>hi</sub>                                                 | 2                                  |                                        | 0.31                    | 0.16                    | 0.38            |
| IgM <sub>lo</sub> IgM <sub>hi</sub>                                                          | 13                                 |                                        | 1.99                    | 1.07                    |                 |
| IgM <sub>lo</sub> IgM only                                                                   | 2                                  |                                        | 0.31                    |                         | 0.38            |
| IgM Only IgM <sub>hi</sub>                                                                   | 24                                 |                                        |                         | 1.98                    | 4.62            |
| Total of shared clonotypes (%)                                                               | 84                                 | 0                                      | 17 (2.60)               | 39 (3.21)               | 28 (5.38)       |
| Total of unique clonotypes (%)                                                               | 2887                               | 583 (100)                              | 637 (97.40)             | 1175 (96.79)            | 492 (94.62)     |
| Total of clonotypes                                                                          | 2971                               | 583                                    | 654                     | 1214                    | 520             |
| <b>Donor 2</b>                                                                               |                                    |                                        |                         |                         |                 |
| <b>Group</b>                                                                                 | <b>Number of Shared clonotypes</b> | <b>Percentage of shared clonotypes</b> |                         |                         |                 |
|                                                                                              |                                    | <b>Naïve</b>                           | <b>IgM<sub>lo</sub></b> | <b>IgM<sub>hi</sub></b> | <b>IgM Only</b> |
| IgM <sub>lo</sub> IgM <sub>hi</sub>                                                          | 4                                  |                                        | 0.55                    | 0.43                    |                 |
| Total of shared clonotypes (%)                                                               | 8                                  | 0                                      | 4 (0.55)                | 4 (0.43)                | 0               |
| Total of unique clonotypes (%)                                                               | 2567                               | 884 (100)                              | 720 (99.45)             | 921 (99.57)             | 42 (100)        |
| Total of clonotypes                                                                          | 2575                               | 884                                    | 724                     | 925                     | 42              |
| <b>Donor 3</b>                                                                               |                                    |                                        |                         |                         |                 |
| <b>Group</b>                                                                                 | <b>Number of Shared clonotypes</b> | <b>Percentage of shared clonotypes</b> |                         |                         |                 |
|                                                                                              |                                    | <b>Naïve</b>                           | <b>IgM<sub>lo</sub></b> | <b>IgM<sub>hi</sub></b> | <b>IgM Only</b> |
| IgM <sub>lo</sub> IgM <sub>hi</sub>                                                          | 5                                  |                                        | 5.15                    | 0.42                    |                 |
| IgM Only IgM <sub>hi</sub>                                                                   | 31                                 |                                        |                         | 2.58                    | 6.77            |
| IgM <sub>hi</sub> Naïve                                                                      | 1                                  | 0.08                                   |                         | 0.08                    |                 |
| Total of shared clonotypes (%)                                                               | 74                                 | 1 (0.08)                               | 5 (5.15)                | 37 (3.08)               | 31 (6.77)       |
| Total of unique clonotypes (%)                                                               | 2993                               | 1308 (99.92)                           | 92 (94.85)              | 1166 (96.92)            | 427 (93.23)     |
| Total of clonotypes                                                                          | 3067                               | 1309                                   | 97                      | 1203                    | 458             |
